# Supplementary material for: Enhancement of hole mobility in hybrid titanium dioxide/poly(3-hexylthiophene) nanocomposites by employing an oligothiophene dye as an interface modifier
Source: Royal Society of Chemistry journal article supplement (doi:10.1039/c7tc02225e), 2017-01-01
Supplement: c7tc02225e1.pdf [file c7tc02225e1.pdf]

## Enhancement of hole mobility in Hybrid Titanium Dioxide/Poly(3-hexylthiophene) Nanocomposites by Employing an Oligothiophene dye as Interface Modifier

### Supporting Information

**Figure 1: Absorption spectra of all dye solutions and different thickness P3HT alone films.**

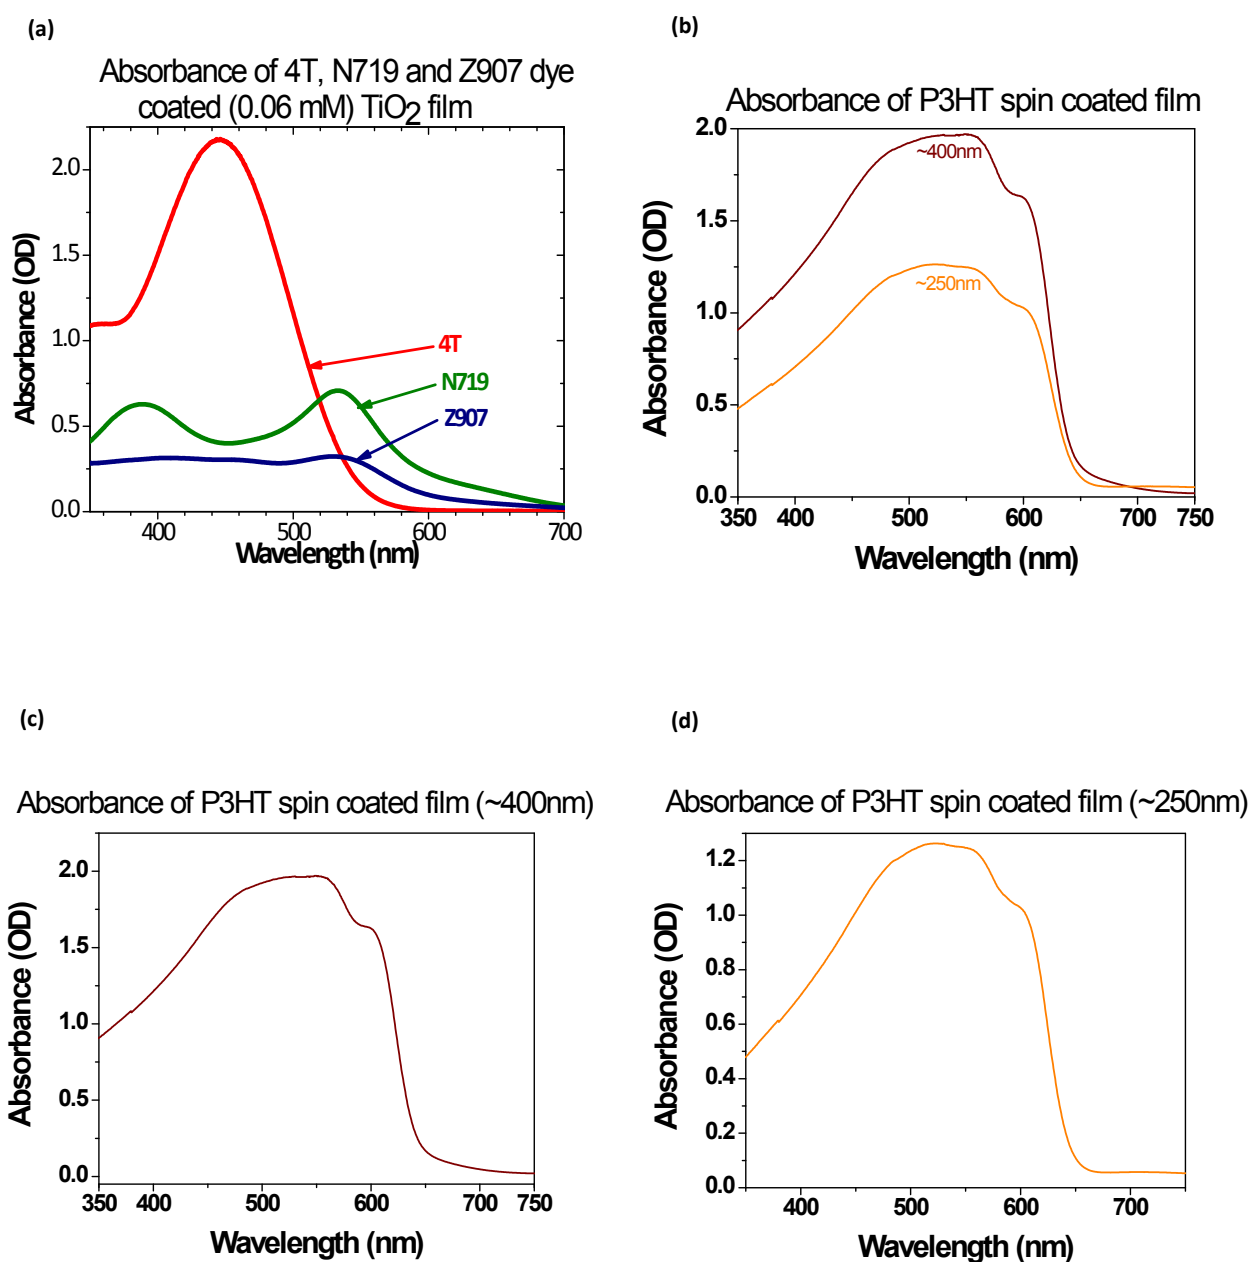

**Figure 2: TOF Traces for control and dye treated films**

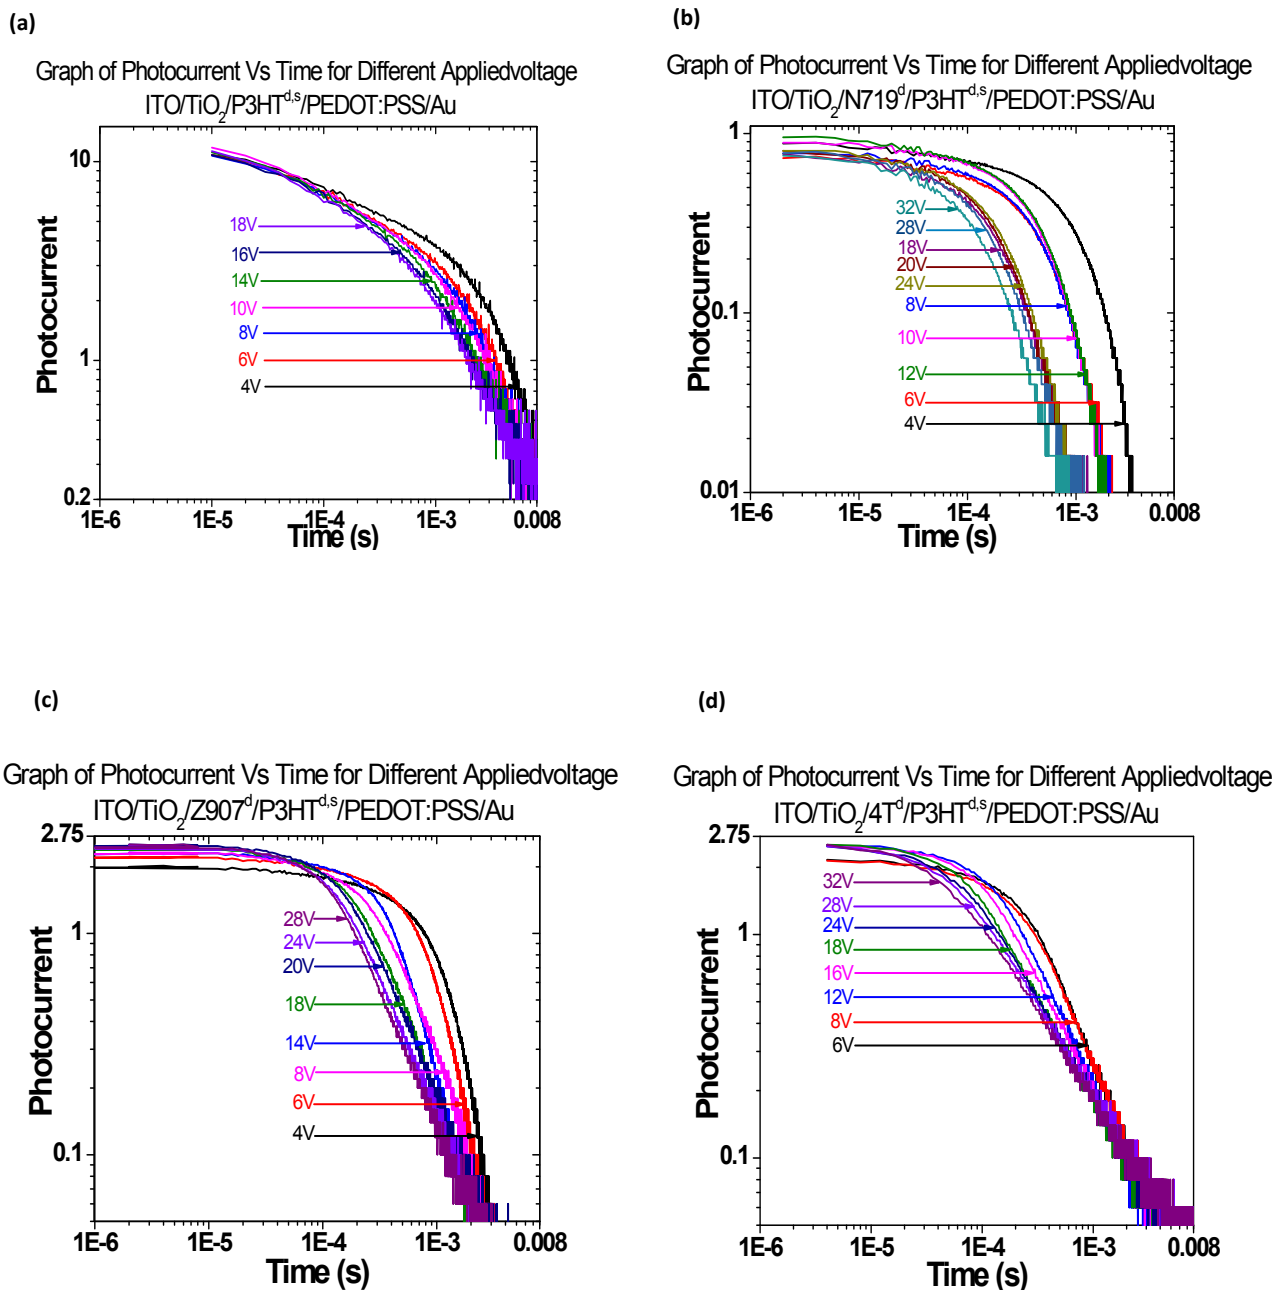

**Note:** Magnitude variation found in the photocurrent between the control and dye treated samples arises due to the different resistance values used in the experiment in order to obtain smooth knees for the particular devices. However this variation will not affect the value of the hole mobility.

**Figure 3: Transients for different thickness of 4T treated films**

(a)

Graph of Photo current Vs Time for Different Applied Voltage  
ITO/TiO<sub>2</sub>/4T<sup>d</sup>/P3HT<sup>d,s</sup>/PEDOT:PSS/Au (Active layer~1 $\mu$ m)

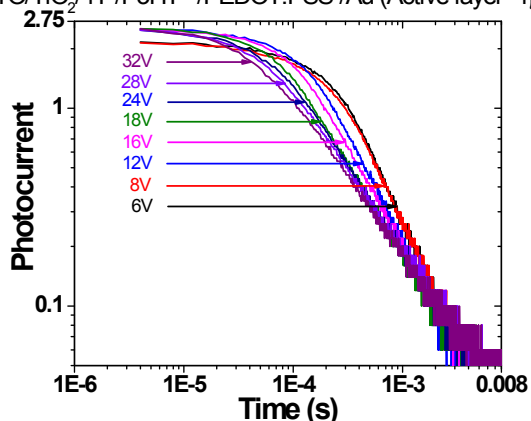

(b)

Graph of Photocurrent Vs Time for Different Applied voltage  
ITO/TiO<sub>2</sub>/4T<sup>d</sup>/P3HT<sup>d,s</sup>/PEDOT:PSS/Au (Active layer~1.5 $\mu$ m)

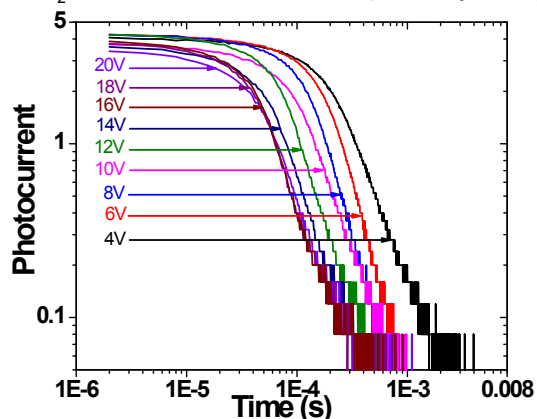

(c)

Graph of Photocurrent Vs Time for Different Applied voltage  
Two different thickness

ITO/TiO<sub>2</sub>/4T<sup>d</sup>/P3HT<sup>d,s</sup>/PEDOT:PSS/Au

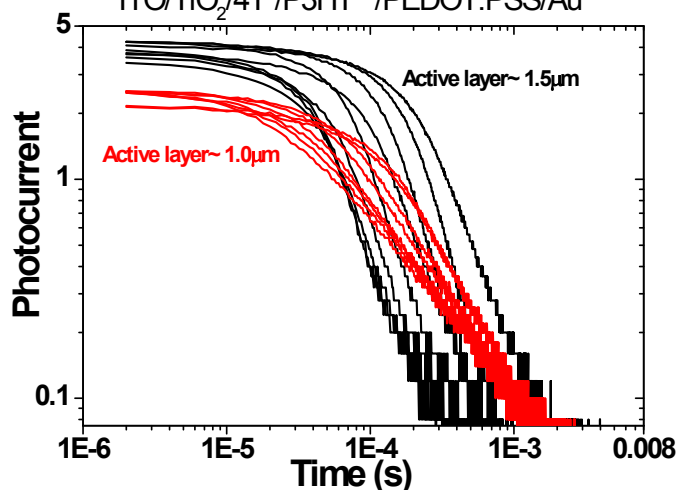

(d)

Graph of Photocurrent Vs Time at 18 V for two different thickness of  
ITO/TiO<sub>2</sub>/4T/P3HT/PEDOT:PSS/Au and ITO/TiO<sub>2</sub>/P3HT/PEDOT:PSS/Au

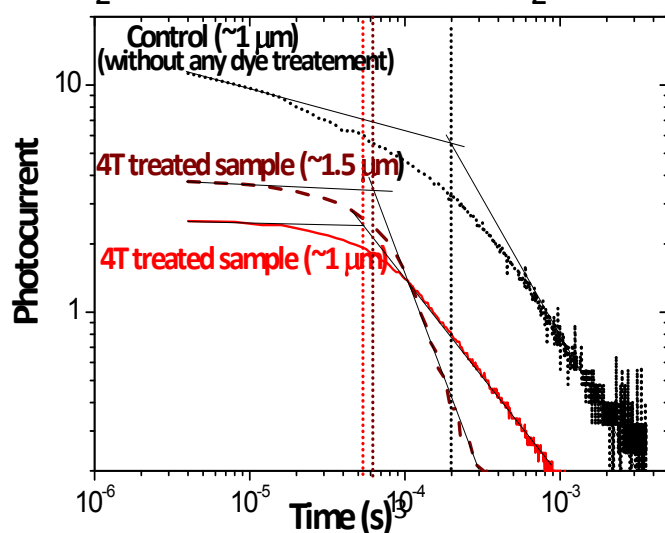

**Note:** Magnitude variation found in the photocurrent between the control and 4T treated samples arises due to the different resistance values used in the experiment in order to obtain smooth knees for the particular devices. However this variation will not affect the value of the hole mobility.

**Figure 4. JV curves for Thick and Thin samples under 80 mW/cm<sup>2</sup>**

**(a): Thick TiO<sub>2</sub>/Dye/P3HT (~ 1 μm) samples used in TOF measurement**

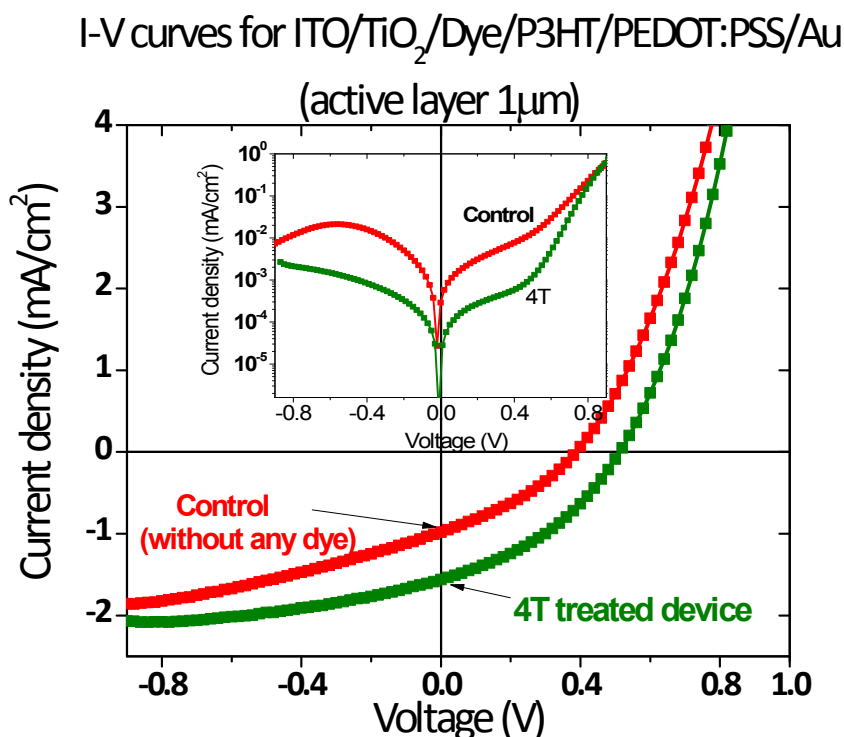

**(b): Thin TiO<sub>2</sub>/Dye/P3HT (~300 nm) samples**

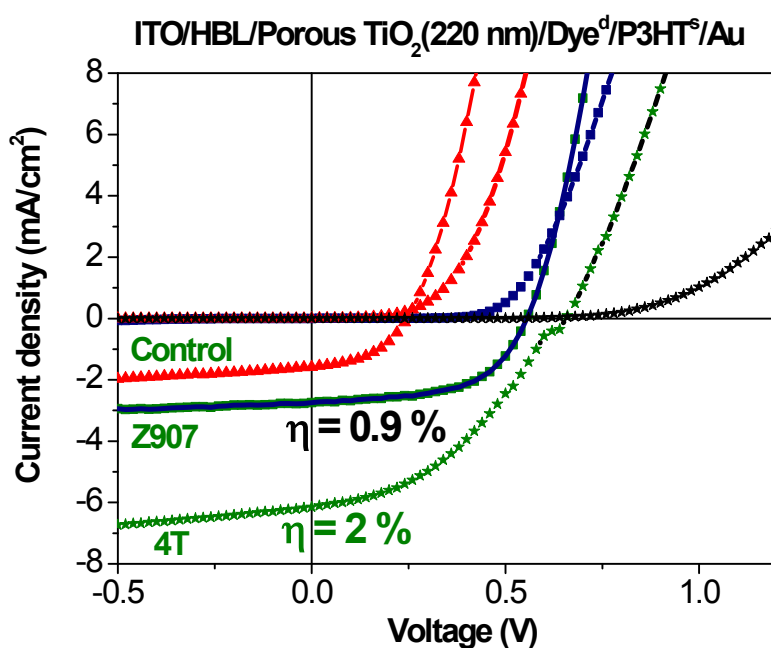

## Figure 5: Contact angle of a water drop on TiO<sub>2</sub> surface

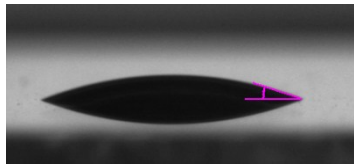

On TiO<sub>2</sub> colloidal film

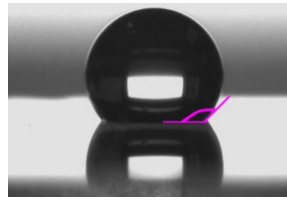

On dye coated TiO<sub>2</sub> colloidal film

The above figures for contact angle measurement clearly show that the surface of the TiO<sub>2</sub> colloidal film becomes less hydrophilic and, therefore, more compatible to the polymer after dye coating. The larger contact angle after dye coating shows that the surface energy of the TiO<sub>2</sub> film has changed.
